# Supplementary material for: Resina Draconis Reduces Acute Liver Injury and Promotes Liver Regeneration after 2/3 Partial Hepatectomy in Mice
Source: Hindawi journal article supplement (doi:10.1155/2020/2305784), 2020-01-01

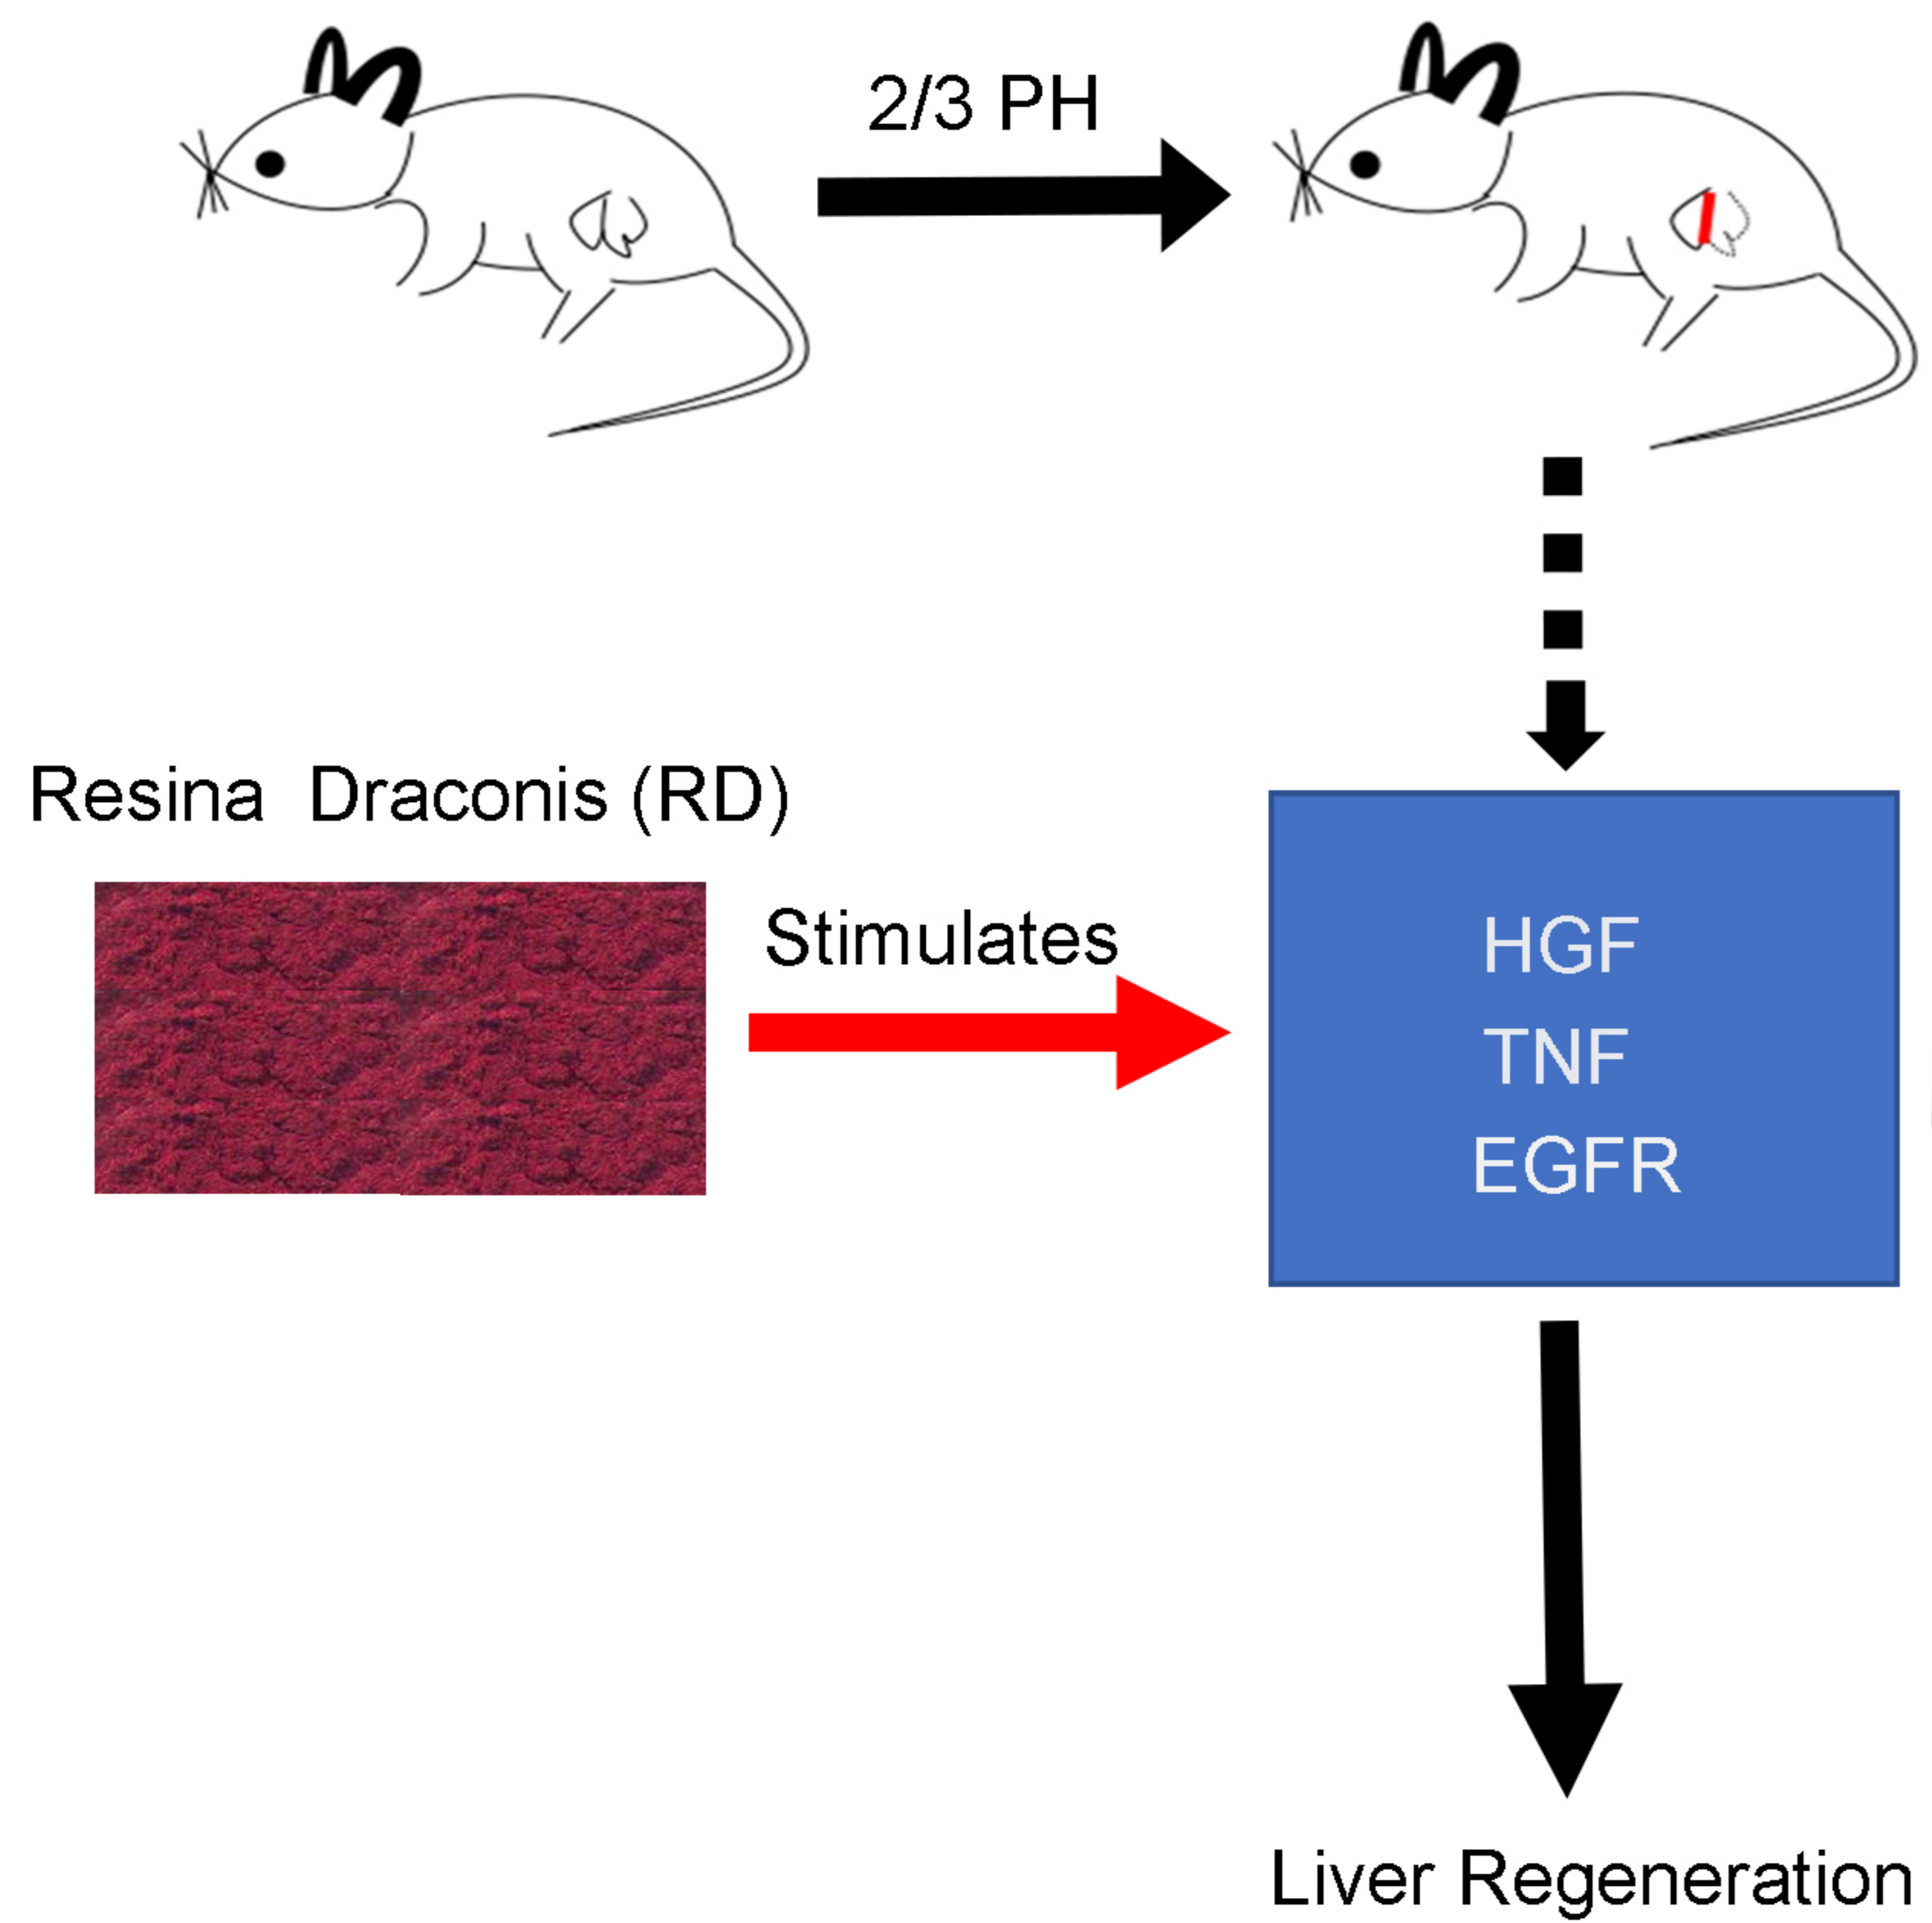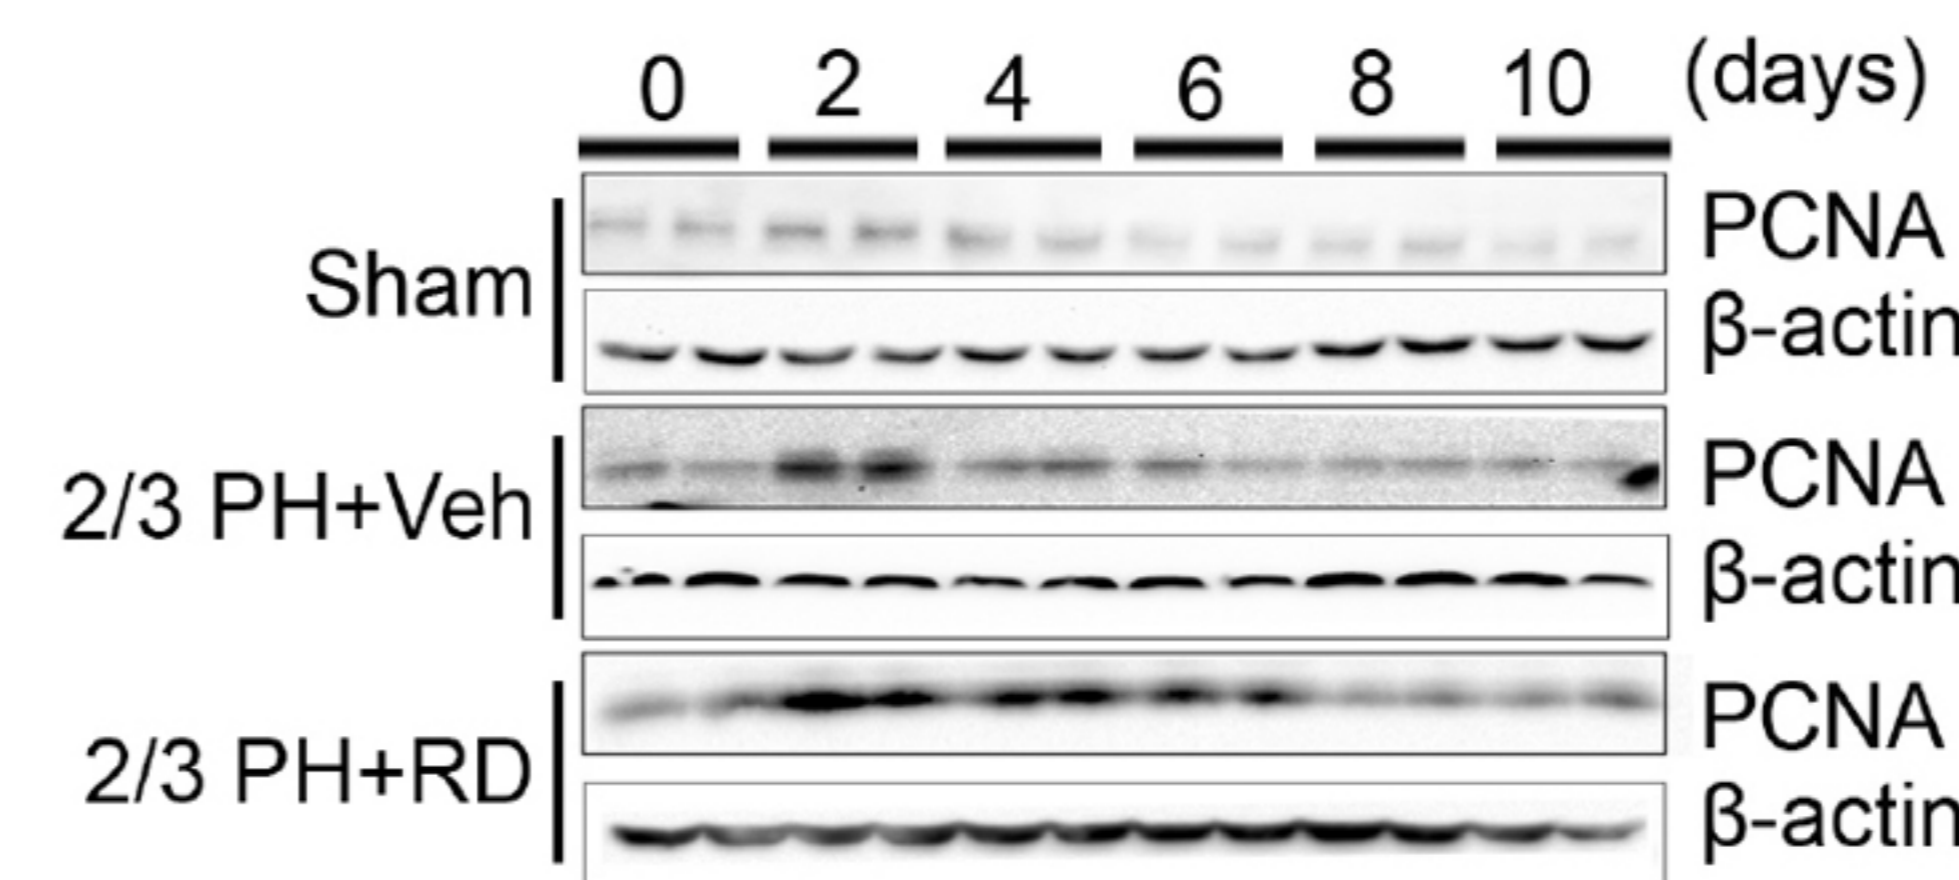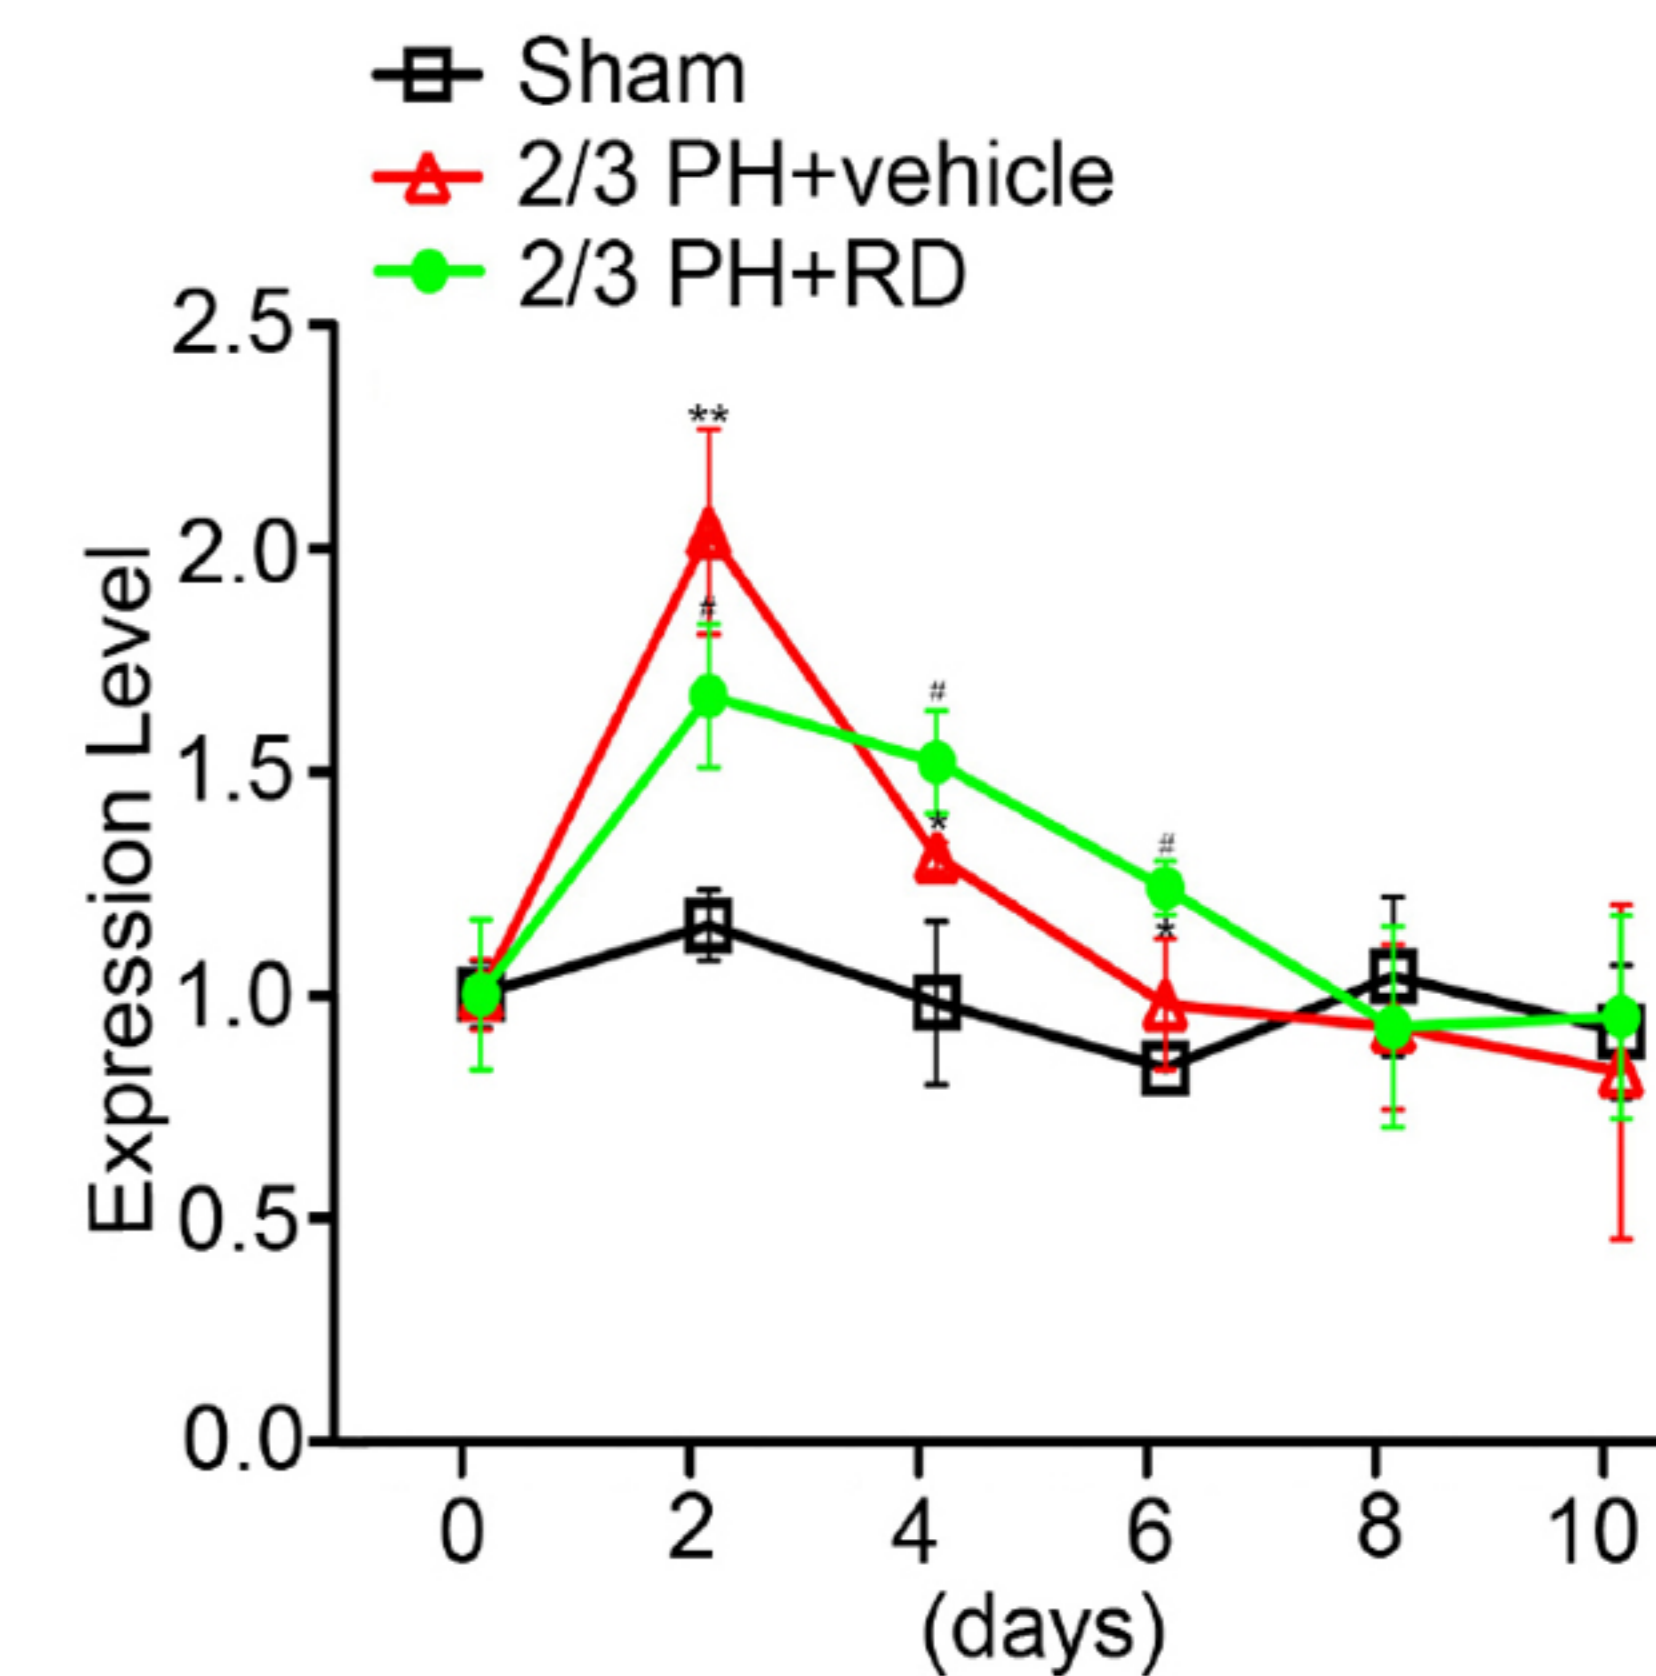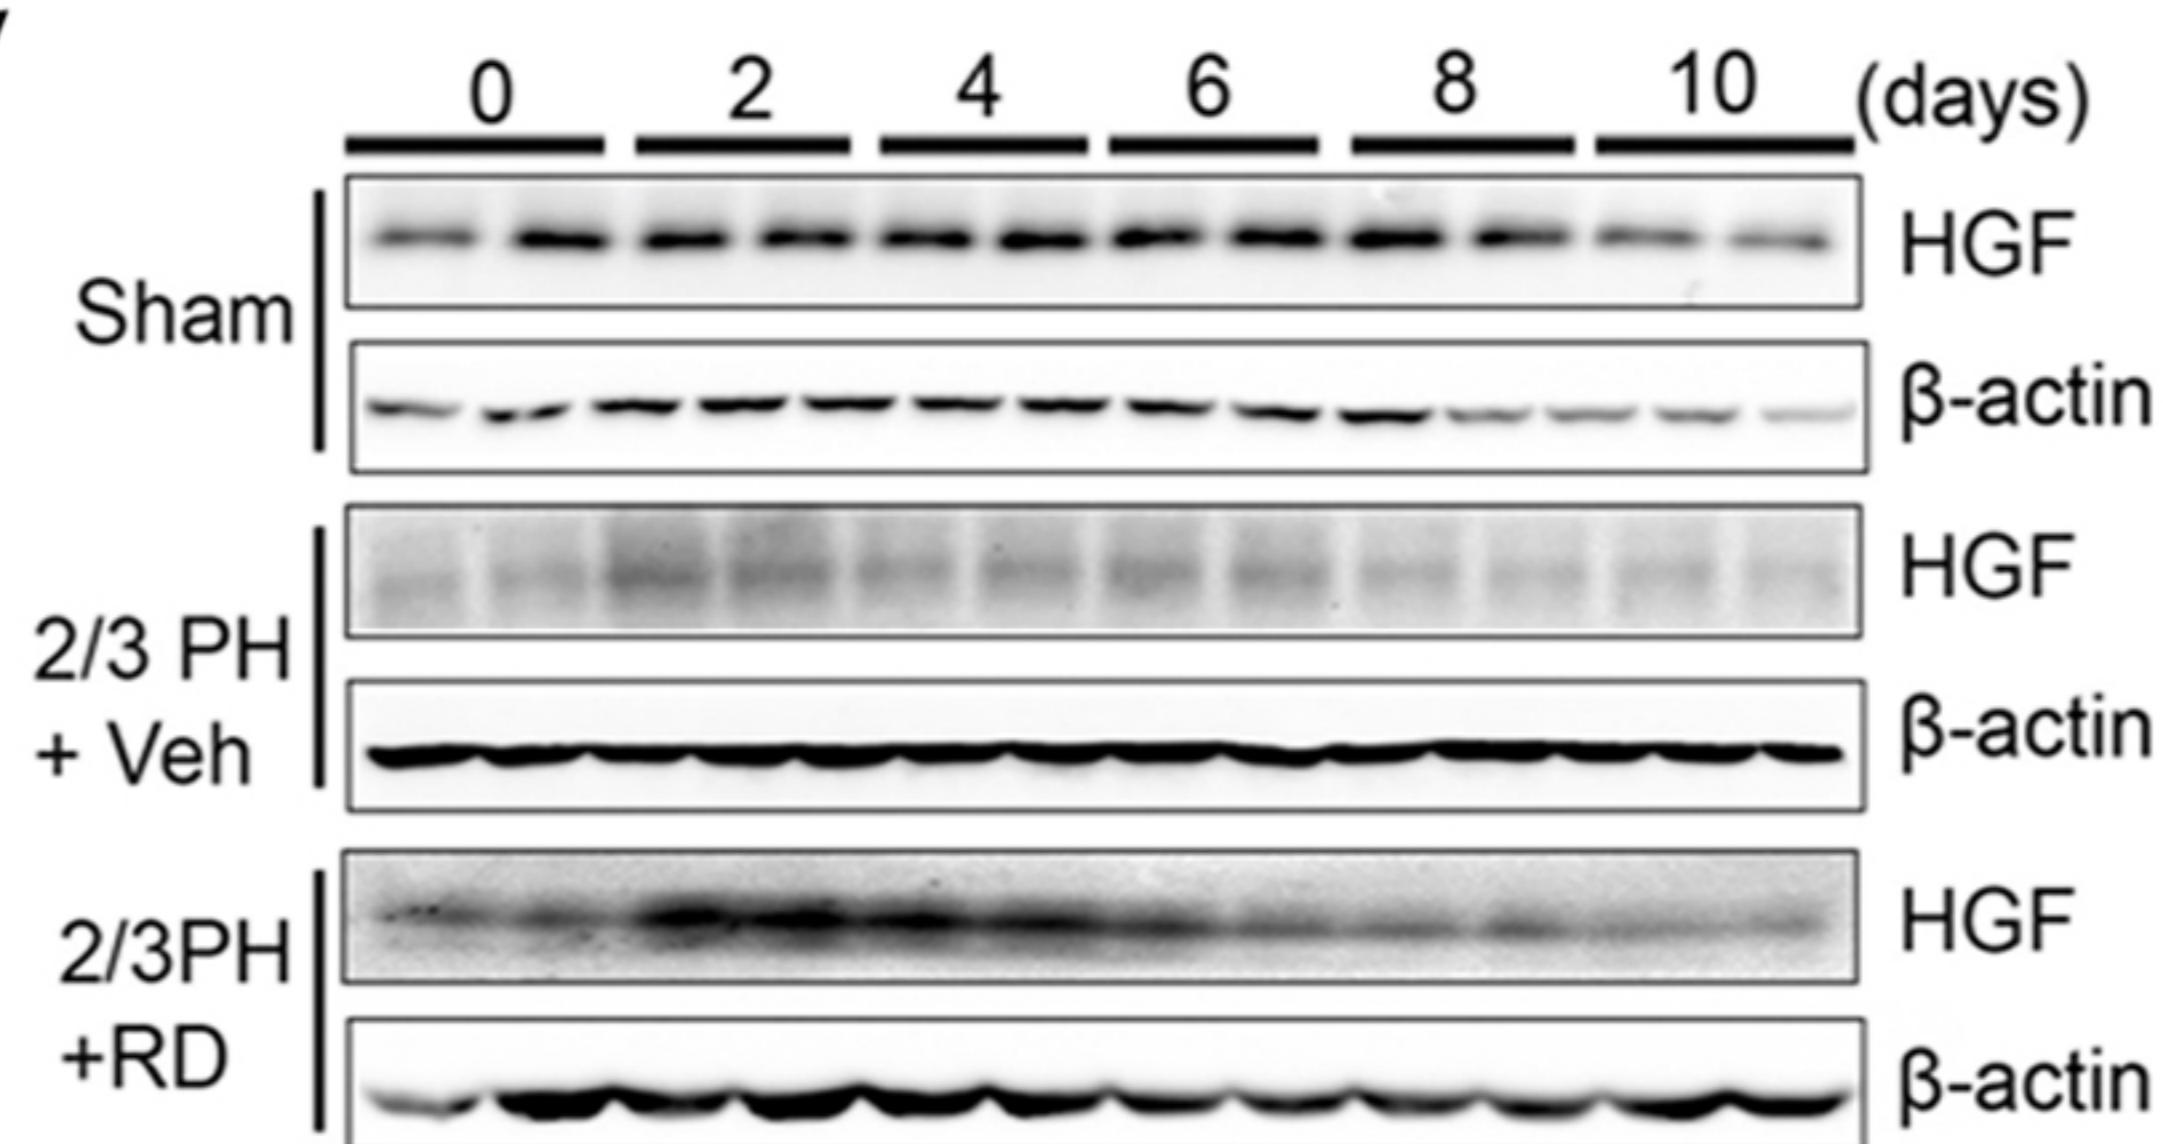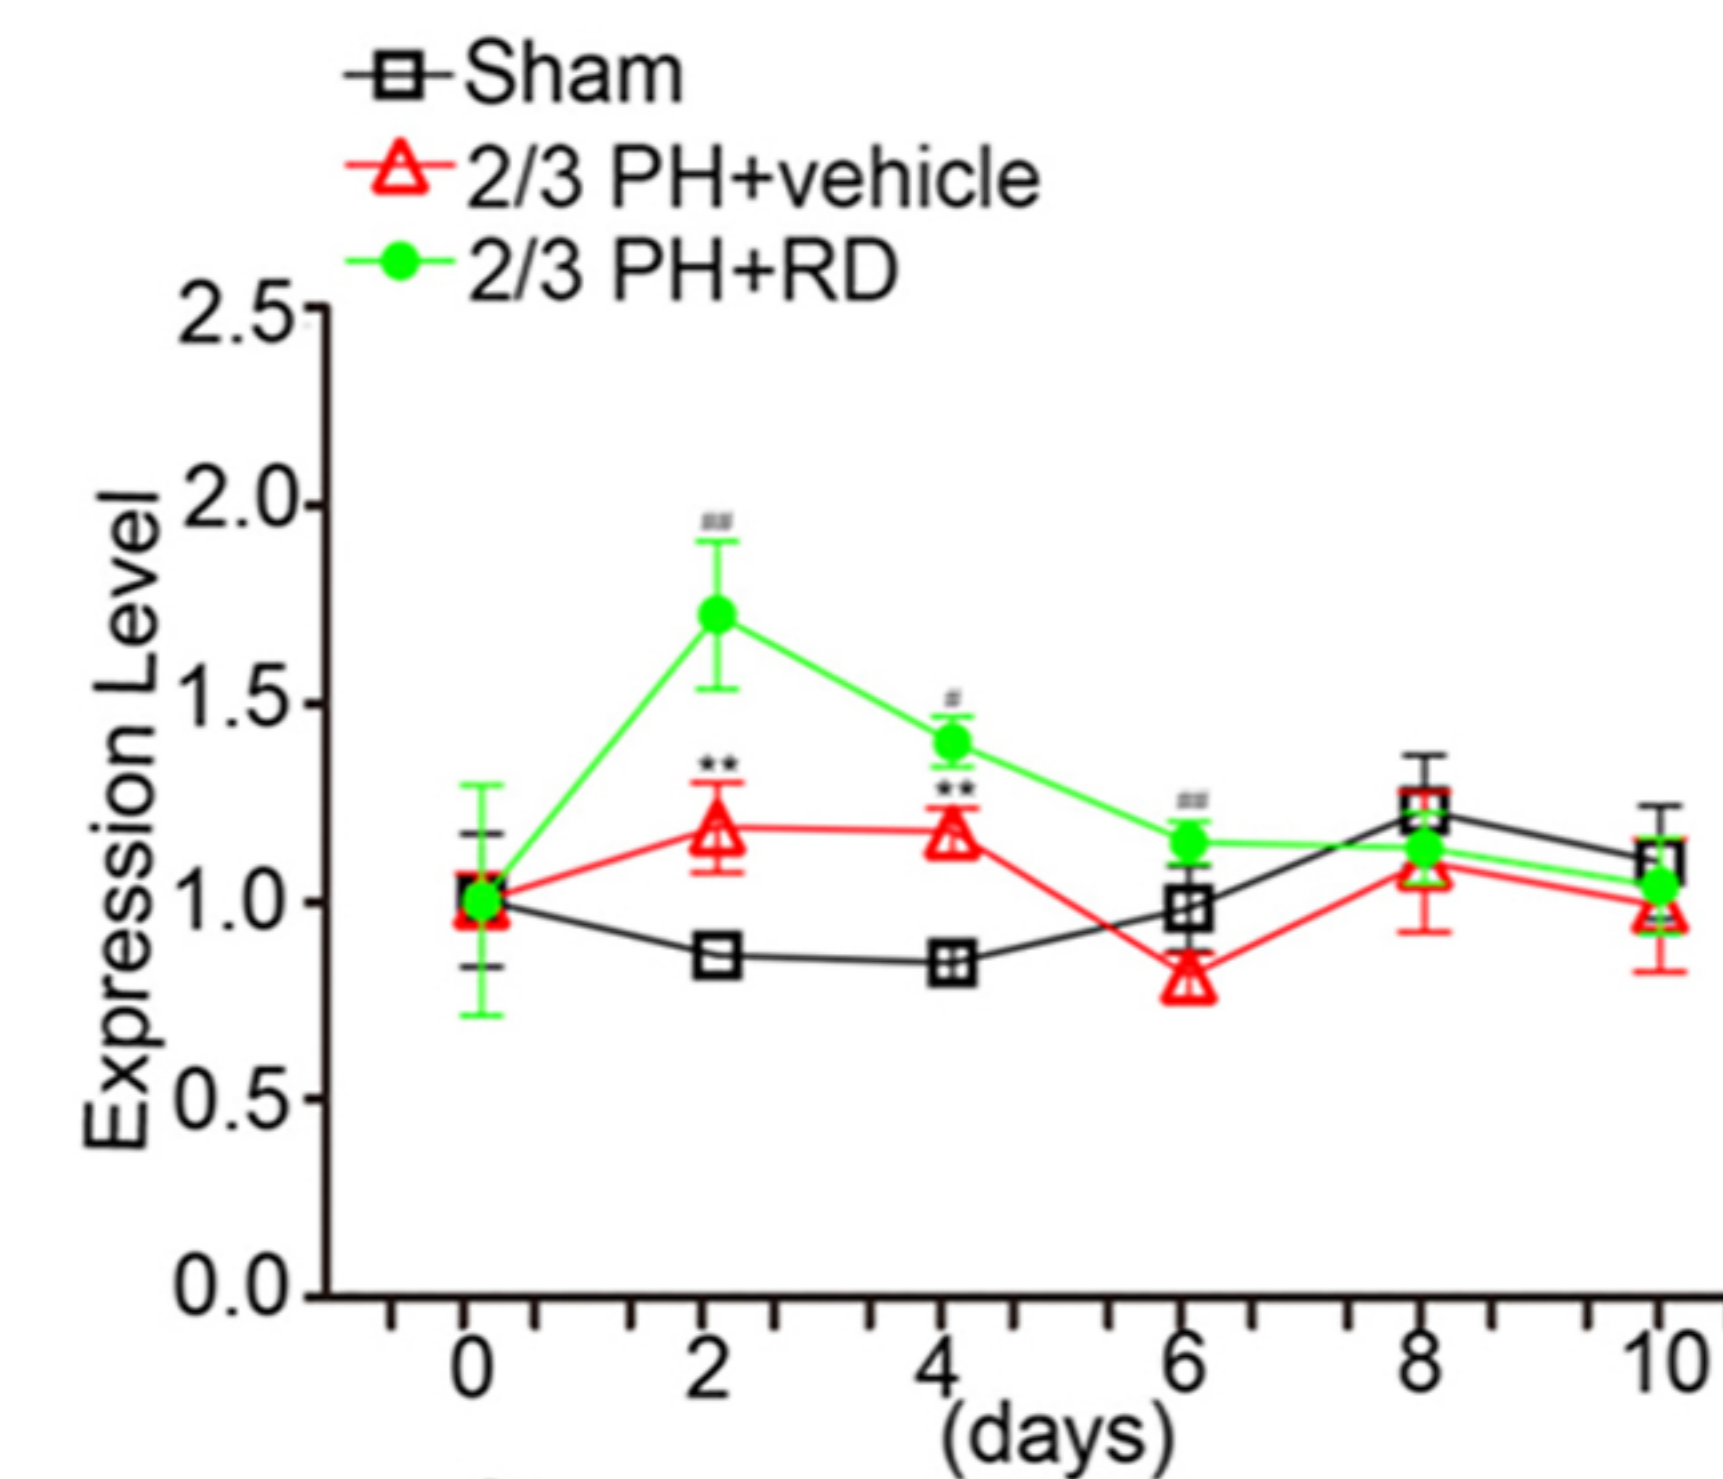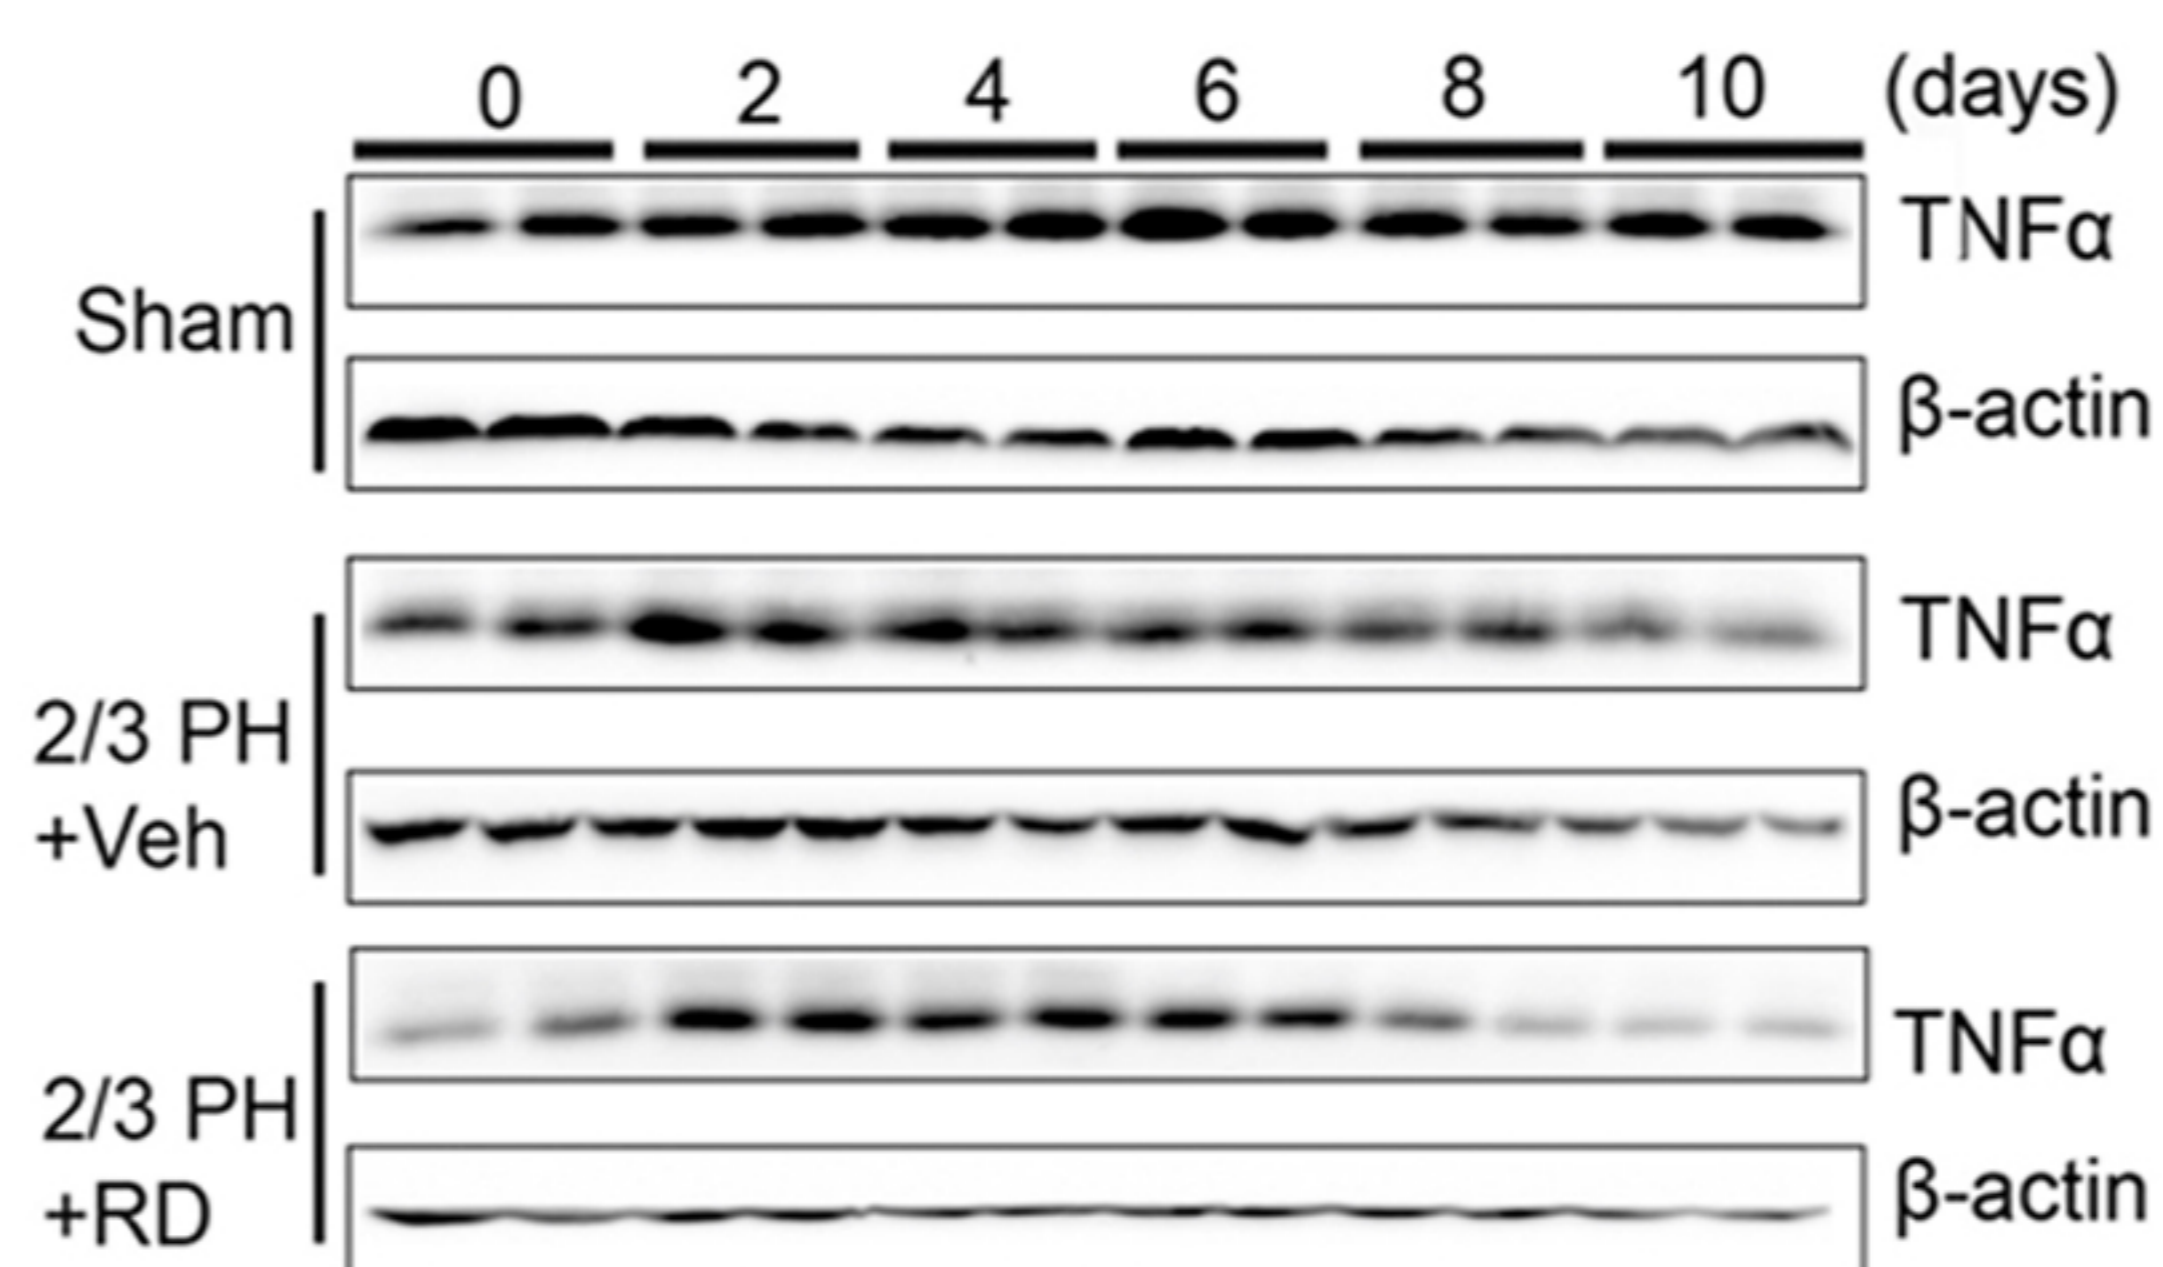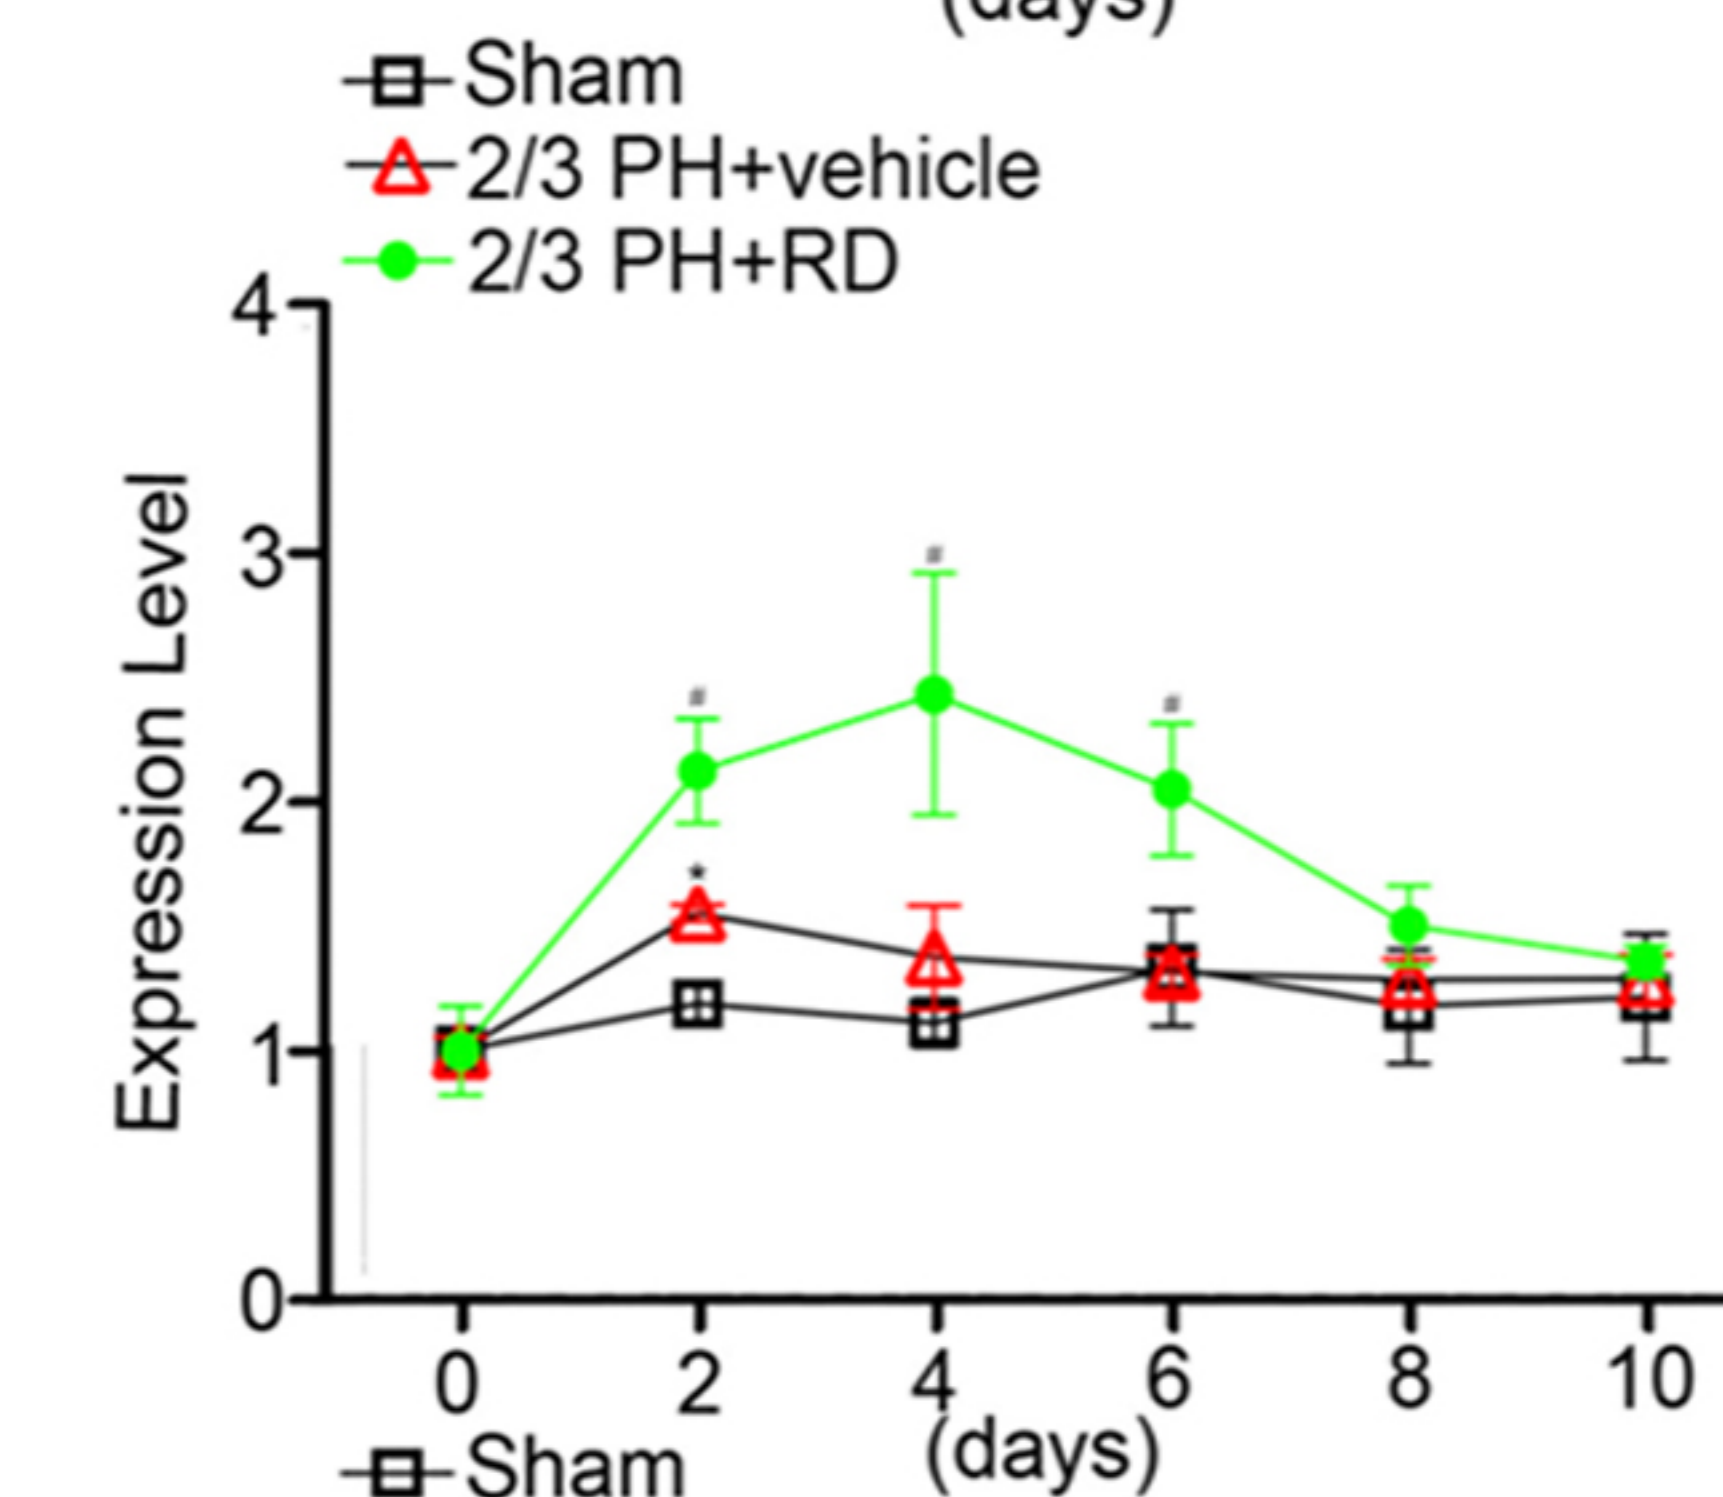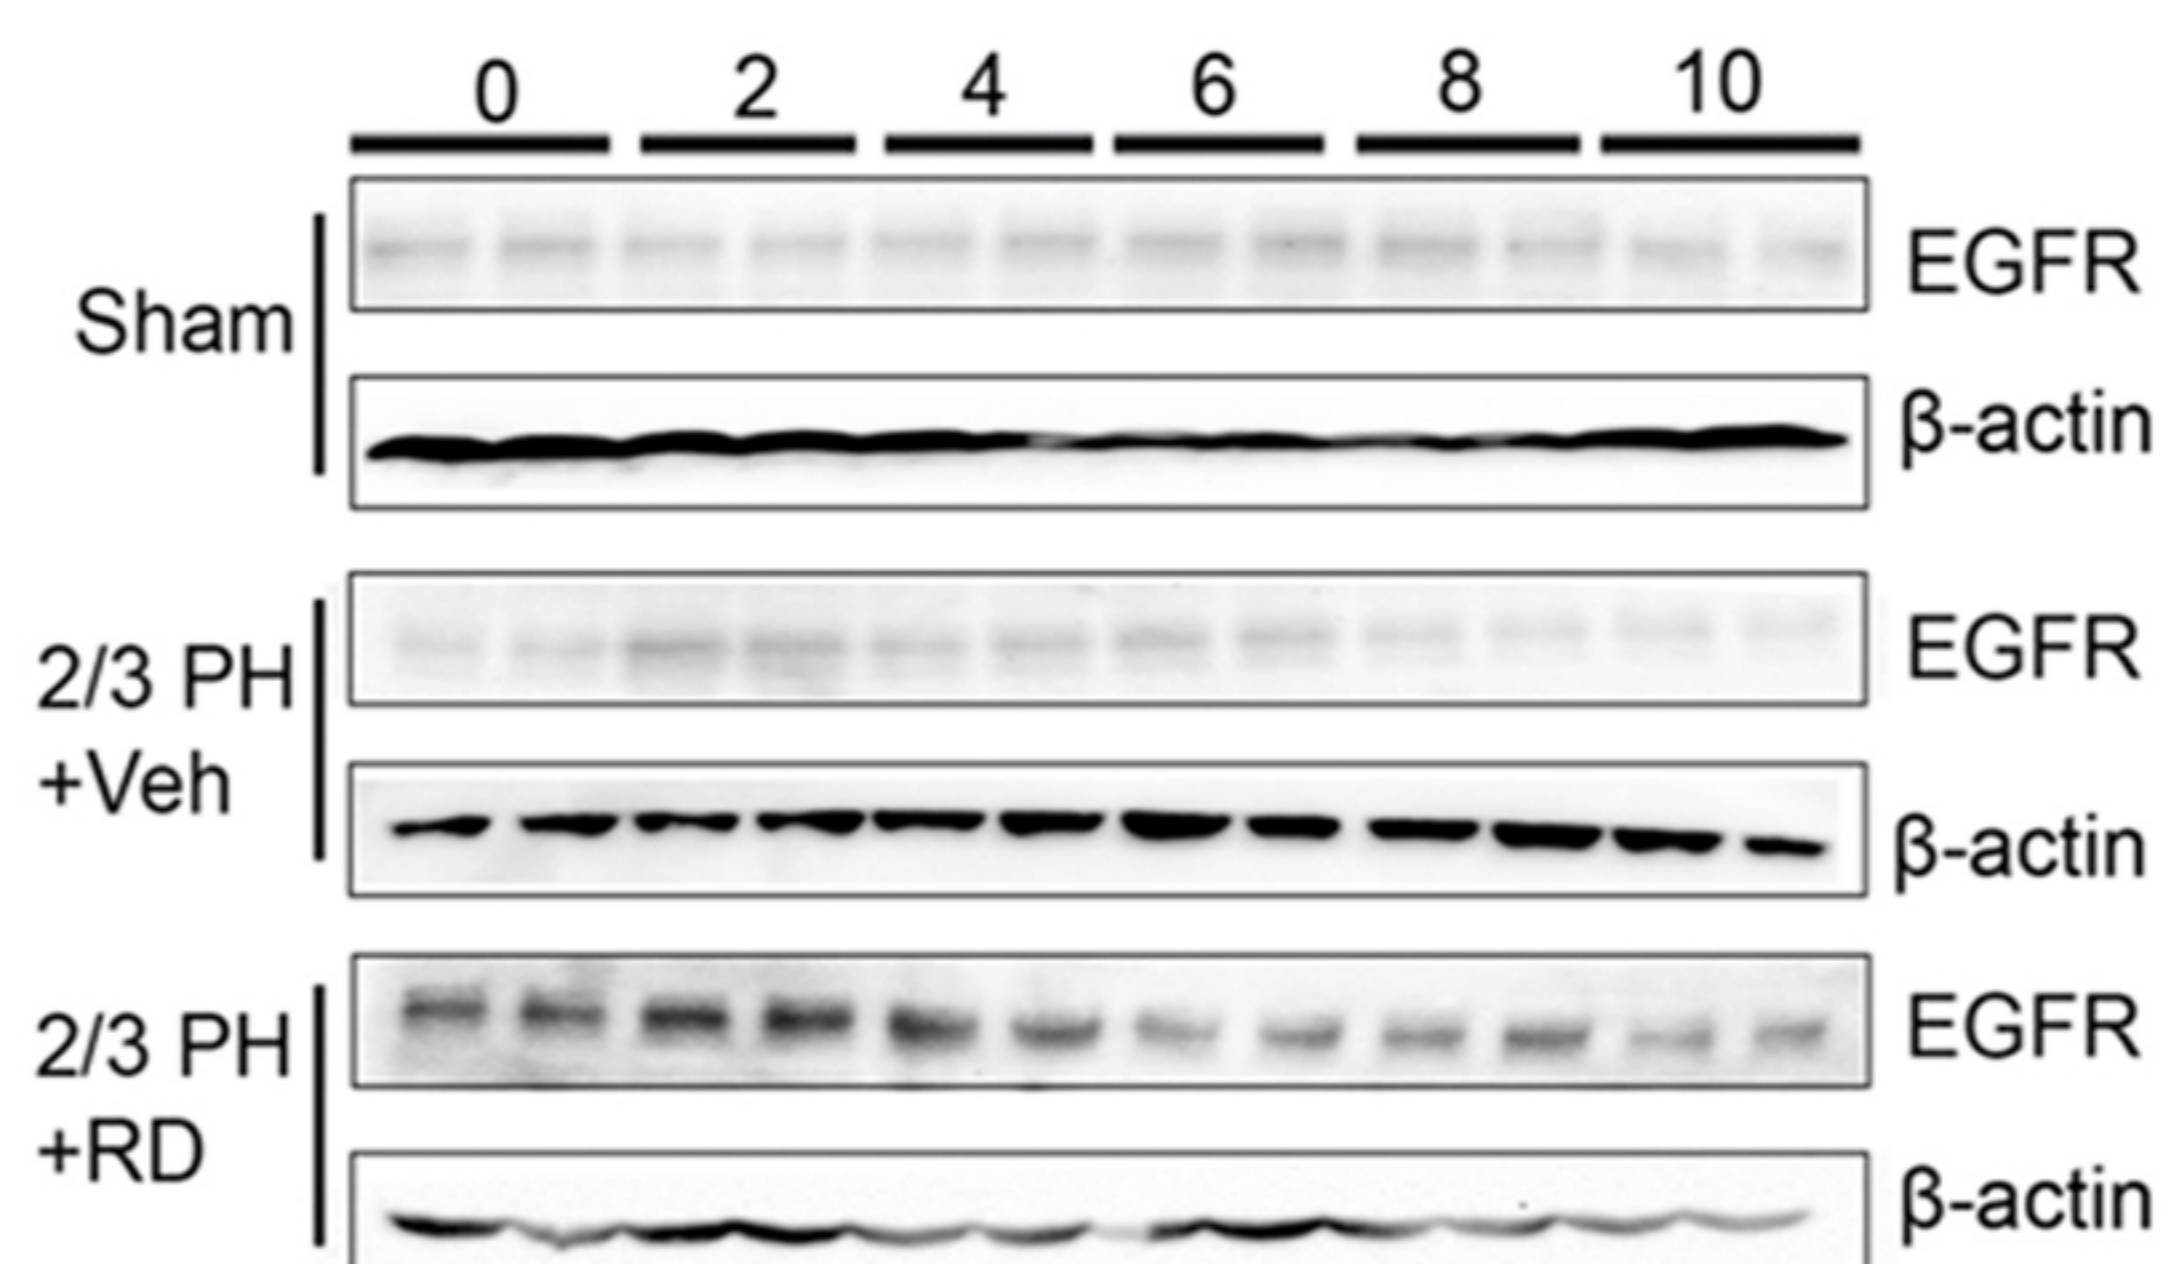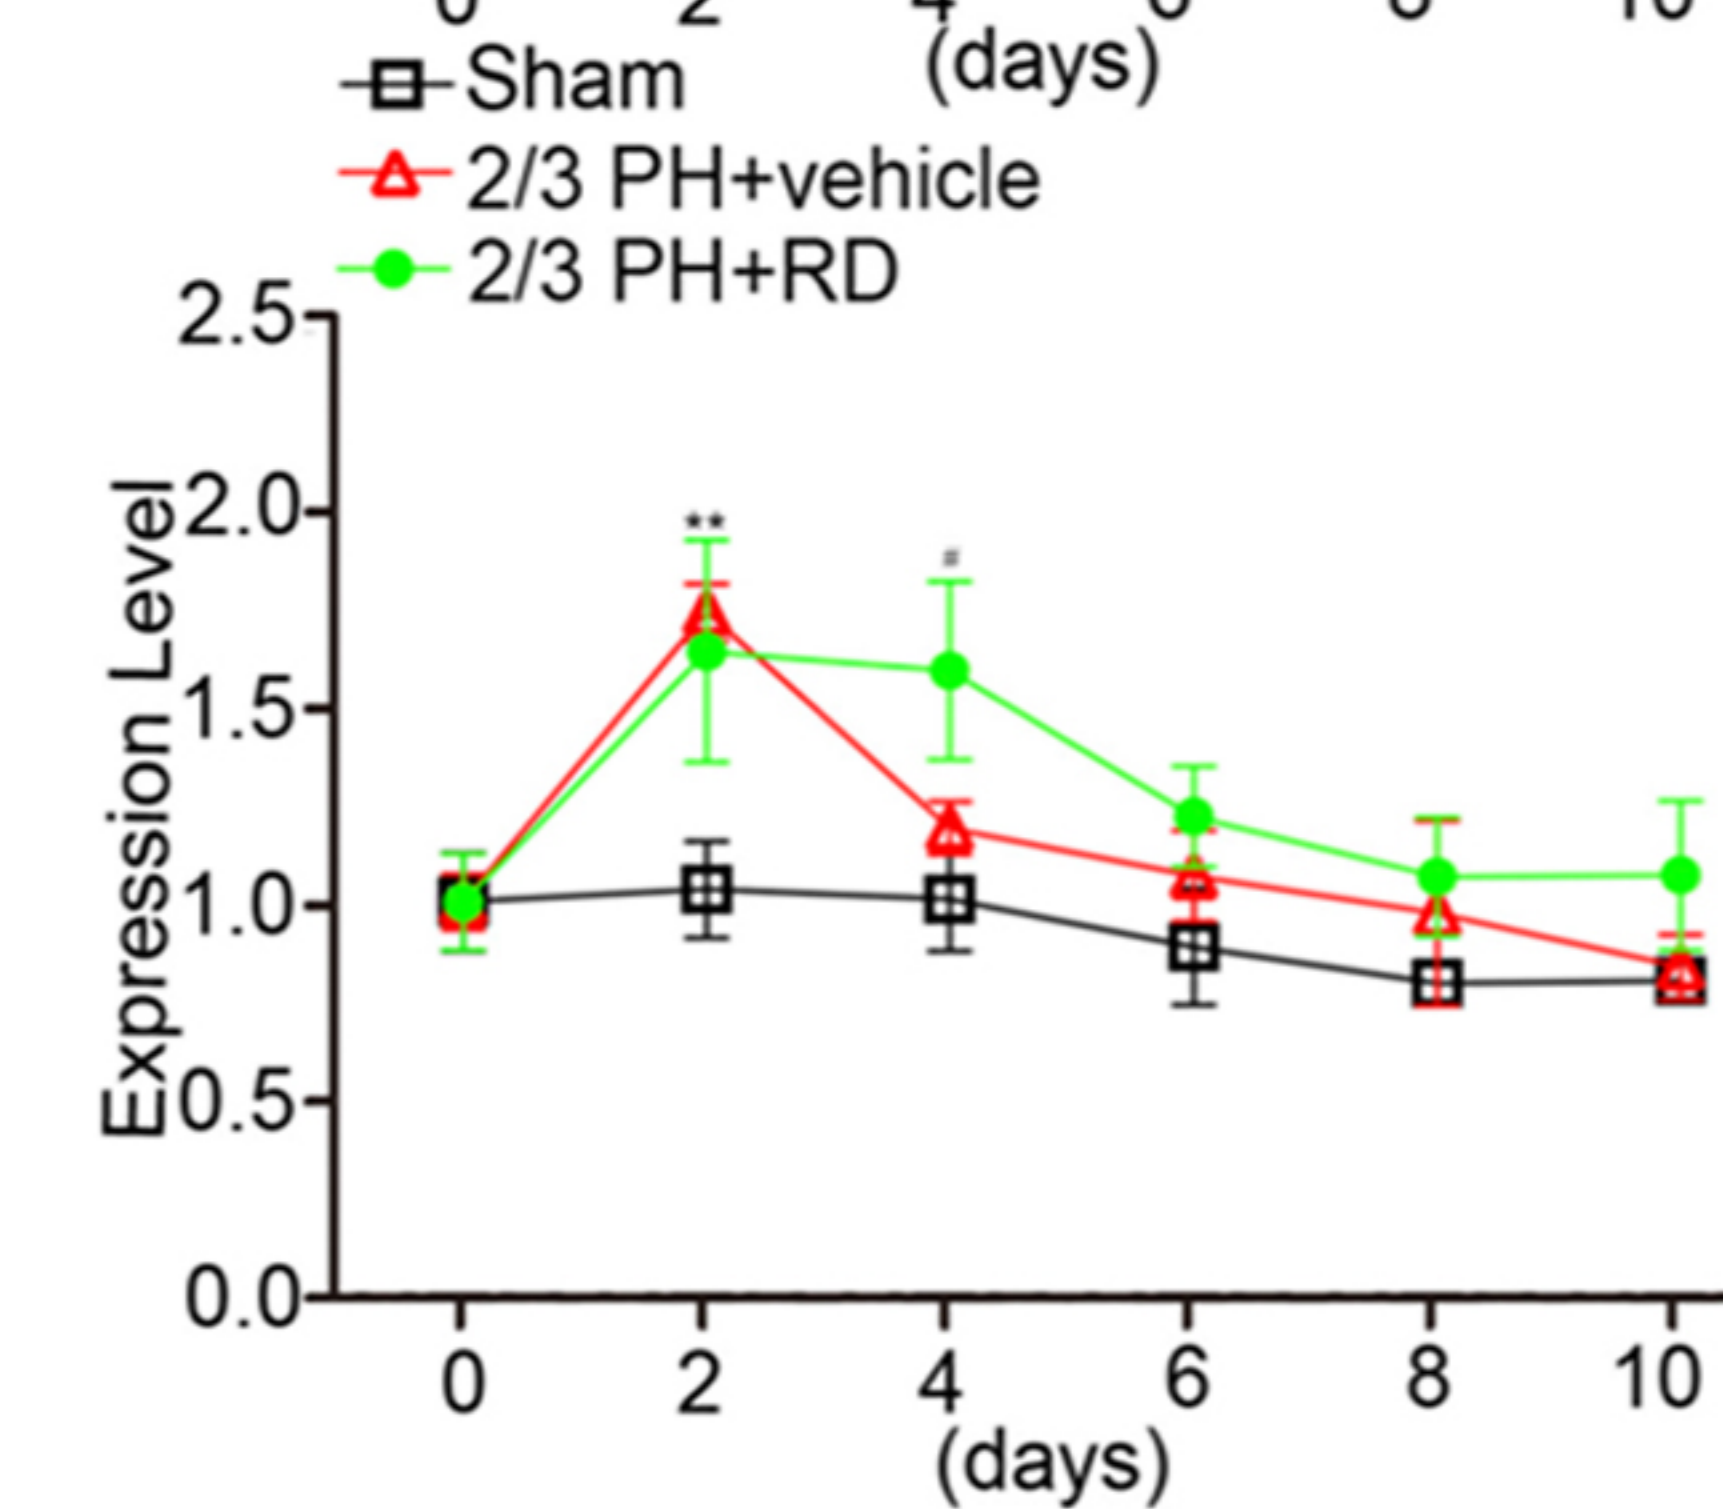

Supplement: f1 [file 2305784.f1.pdf]
